# Supplementary material for: Noncanonical frizzled signaling regulates cell polarity of growth plate chondrocytes
Source: Oxford University Press journal article supplement (doi:10.1242/dev.023820), 2009-02-19
Supplement: dev023820supptables1.pdf [file dev023820supptables1.pdf]

**Table S1. Summary of specimens analyzed**

| Analysis  | Specimen*             | Chondrocytes <sup>†</sup> | Figure | <i>n</i> (cells) | # Humeri | # Embryos |
|-----------|-----------------------|---------------------------|--------|------------------|----------|-----------|
| Metaphase | WT                    | P                         | 2H     | 53               | 8        | 4         |
|           | WT                    | R                         | 2H     | 39               | 8        | 4         |
| Telophase | WT                    | P                         | 2F     | 79               | 8        | 4         |
|           | WT                    | R                         | 2F     | 58               | 6        | 3         |
|           | WT                    | PH                        | 2F     | 31               | 12       | 6         |
|           | WT E6                 | P                         | 2F     | 66               | 8        | 4         |
|           | WT2                   | P                         | 3B     | 59               | 8        | 4         |
|           | GFP                   | P                         | S1     | 62               | 4        | 4         |
|           | Fzd7                  | P                         | 3B     | 57               | 5        | 5         |
|           | Fzd7 <sup>-C</sup>    | R                         | 3B     | 64               | 5        | 5         |
|           | Fzd7 <sup>-C</sup>    | P                         | 3B     | 49               | 4        | 4         |
|           | dnLef1                | P                         | 5I     | 79               | 5        | 5         |
|           | Dkk                   | P                         | 5I     | 42               | 3        | 3         |
|           | daCamKII              | P                         | 5I     | 35               | 6        | 6         |
|           | Vangl1                | P                         | 6D     | 46               | 4        | 4         |
|           | Vangl2                | P                         | 6D     | 105              | 7        | 7         |
|           | Vangl2 <sup>-C</sup>  | P                         | 6D     | 41               | 3        | 3         |
|           | dnRock2 <sup>-N</sup> | P                         | 6D     | 65               | 4        | 4         |
| Mosaic    | WT                    | P                         | 3D     | 168              | 4        | 4         |
|           | Fzd7 <sup>-C</sup>    | P                         | 3D     | 255              | 5        | 5         |
|           | D2                    | P                         | 3D     | 141              | 4        | 4         |
|           | D2KM                  | P                         | 3D     | 131              | 4        | 4         |
|           | Vangl2                | P                         | 6E     | 220              | 5        | 5         |

\*WT, wild type; WT2, second set of WT data; WT E6, WT from E6 embryo.

<sup>†</sup>R, resting chondrocytes; P, proliferative chondrocytes; PH, prehypertrophic chondrocytes.
