# Supplementary material for: Noncanonical frizzled signaling regulates cell polarity of growth plate chondrocytes
Source: Oxford University Press journal article supplement (doi:10.1242/dev.023820), 2009-02-19
Supplement: dev023820supptables2.pdf [file dev023820supptables2.pdf]

**Table S2. Comparison of phenotypes of mouse mutants that affect cell-matrix interactions**

| Mutant                                 | Maturation*            | Columns <sup>†</sup> | Short <sup>‡</sup> | Wide <sup>§</sup> | Proliferation | Apoptosis | Cell density                            | Reference                                    |
|----------------------------------------|------------------------|----------------------|--------------------|-------------------|---------------|-----------|-----------------------------------------|----------------------------------------------|
| Rac1 (Rho GTPase)                      | Decreased <sup>¶</sup> | Reduced**            | Y                  | N                 | Decreased     | Y         | Hypocellular <sup>††</sup> in all zones | (Wang et al. 2007)                           |
| Ilk (integrin-linked kinase)           | Normal                 | Reduced              | Y (mild)           | N                 | Decreased     | N         | Slightly reduced, some hypocellularity  | (Grashoff et al. 2003; Terpstra et al. 2003) |
| integrin $\beta$ 1 (matrix receptor)   | Decreased              | Reduced              | Y                  | Y                 | Decreased     | Y         | Reduced /multi-nucleate cells           | (Aszodi et al. 2003)                         |
| integrin $\alpha$ 10 (matrix receptor) | Reduced                | Y                    | N                  | N                 | Decreased     | N         | Some hypocellularity                    | (Bengtsson et al. 2004)                      |
|                                        | hypertrophic zone      |                      |                    |                   |               |           |                                         |                                              |
| Col9a1 (matrix protein)                | Decreased              | Reduced              | Y (mild)           | Y (mild)          | Decreased     | N.D.      | Central hypocellular region             | (Blumbach et al. 2008; Dreier et al. 2008)   |

Y, yes; N, no; N.D., not determined.

\*Changes in the size of maturation zones as measured from histological sections or in situ hybridization.

<sup>†</sup>Column formation is evident in histological sections.

<sup>‡</sup>Change in the length of long bones.

<sup>§</sup>Change in the width of long bones.

<sup>¶</sup>Decreased: reduction in size or gene expression in more than one chondrocyte zone.

\*\*Reduced: mixture of morphologically normal and abnormal proliferative chondrocytes.

<sup>††</sup>Hypocellular: regions of low cell density that are occupied by matrix proteins.

#### References

- Bengtsson, T., Aszodi, A., Nicolae, C., Hunziker, E. B., Lundgren-Akerlund, E. and Fassler, R. (2005). Loss of alpha10beta1 integrin expression leads to moderate dysfunction of growth plate chondrocytes. *J. Cell Sci.* **118**, 929-936.
- Grashoff, C., Aszodi, A., Sakai, T., Hunziker, E. B. and Fassler, R. (2003). Integrin-linked kinase regulates chondrocyte shape and proliferation. *EMBO Rep.* **4**, 432-438.
- Terpstra, L., Prud'homme, J., Arabian, A., Takeda, S., Karsenty, G., Dedhar, S. and St-Arnaud, R. (2003). Reduced chondrocyte proliferation and chondrodysplasia in mice lacking the integrin-linked kinase in chondrocytes. *J. Cell Biol.* **162**, 139-148.
- Wang, G., Woods, A., Agoston, H., Ulici, V., Glogauer, M. and Beier, F. (2007). Genetic ablation of Rac1 in cartilage results in chondrodysplasia. *Dev. Biol.* **306**, 612-623.
